# Supplementary material for: Synthesis, In Silico, and Biological Evaluation of a Borinic Tryptophan-Derivative That Induces Melatonin-like Amelioration of Cognitive Deficit in Male Rat
Source: MDPI journal article supplement (doi:10.3390/ijms23063229), 2022-03-17
Supplement: s1 [file s1]

## Supplementary material

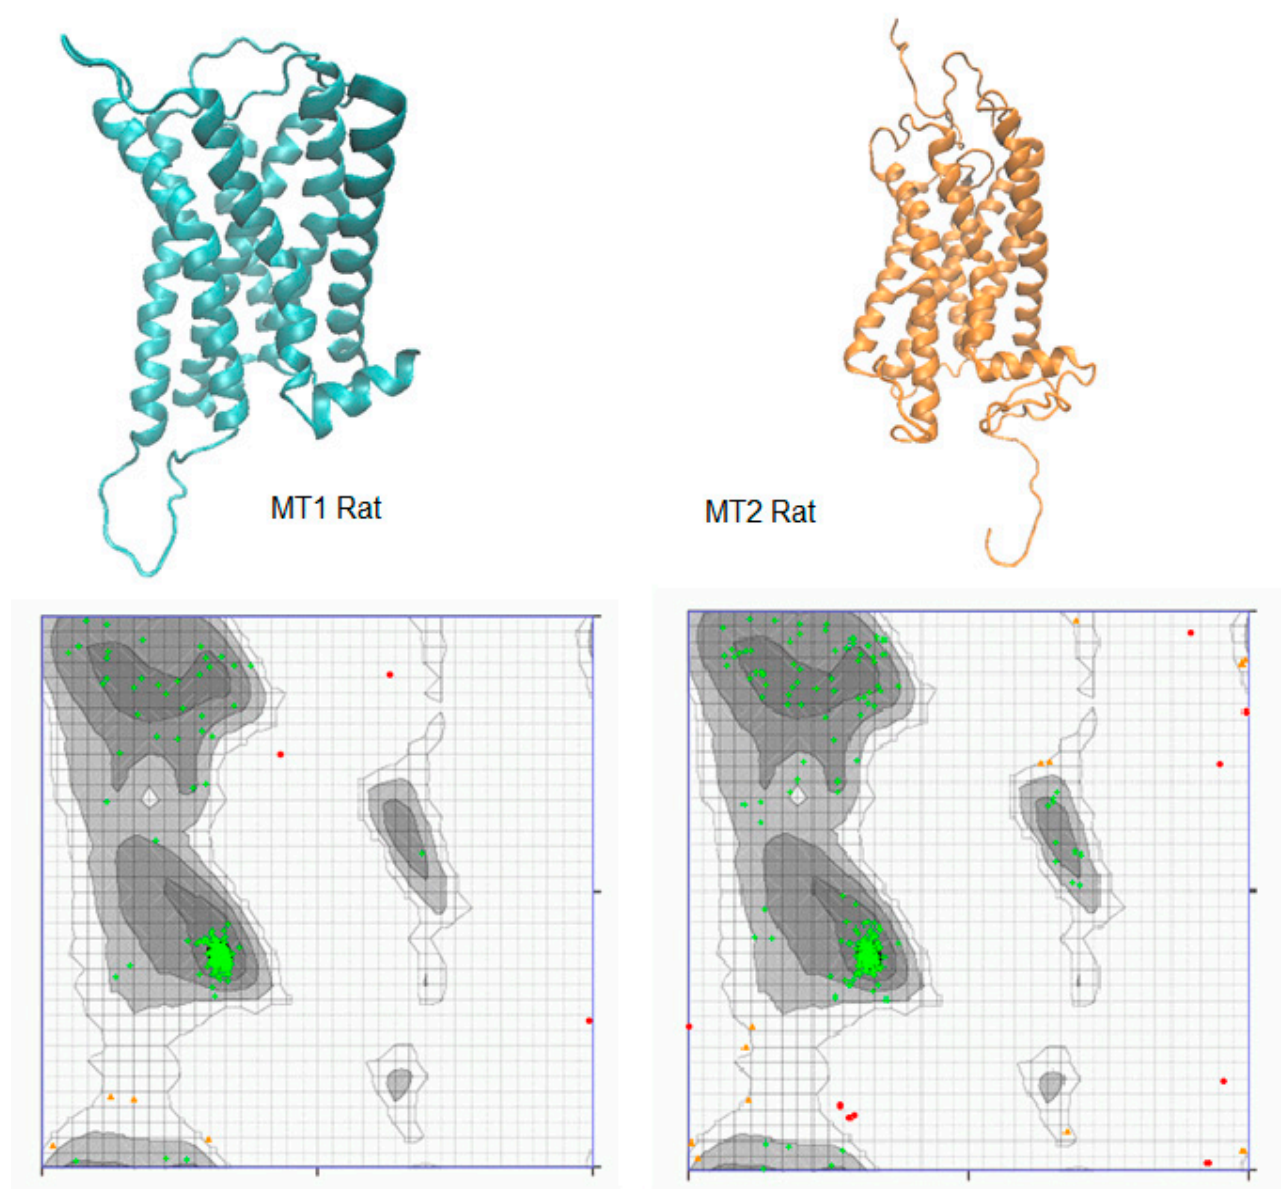

**Figure S1.** Ramachandran plots for built rat MT1 and MT2 receptors.

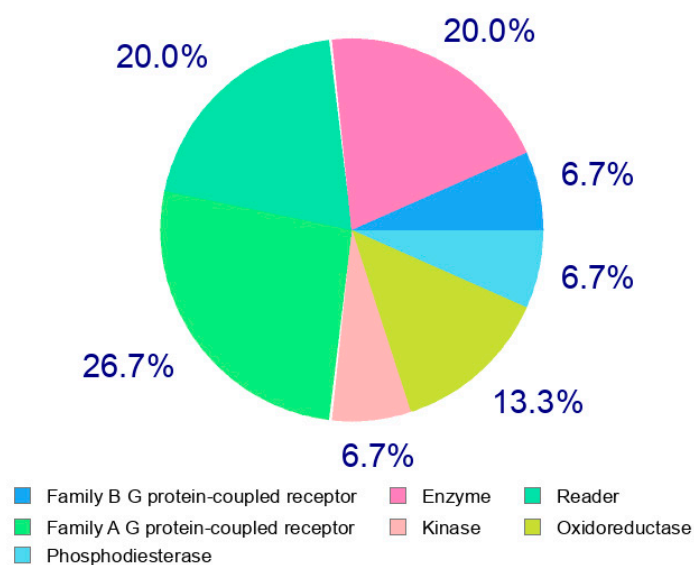

**Figure S2.** The Swiss-target prediction results regarding targets for boromelatonin compound. The mentioned server predicted G-protein coupled receptors in family A as the group with higher probability of interaction for borolatonin. Results include melatonin, serotonin, histamine, purinergic and trace amine-associated receptors.

**Table S1.** Predicted and reported experimental affinity of well-known melatonin receptor ligands.

| Ligand                        | On MT1 melatonin receptor |                           | Ligand           | On MT2 melatonin receptor |                           |
|-------------------------------|---------------------------|---------------------------|------------------|---------------------------|---------------------------|
|                               | Theoretical               | Experimental <sup>a</sup> |                  | Theoretical               | Experimental <sup>a</sup> |
| LUZINDOLE                     | 3.84                      | 6.5                       | S26131           | 4.08                      | 6.9                       |
| S20928                        | 3.93                      | 6.65                      | 5-HEAT           | 5.71                      | 7.1                       |
| -PDOT                         | 3.96                      | 6.7                       | S20928           | 4.23                      | 7.15                      |
| AZD7325                       | 4.08                      | 6.9                       | LUZINDOLE        | 4.65                      | 7.85                      |
| UCM724                        | 4.08                      | 6.9                       | UCM724           | 4.74                      | 8                         |
| K185                          | 4.26                      | 7.2                       | S22153           | 4.83                      | 8.15                      |
| 5-HEAT                        | 5.35                      | 7.8                       | HYDROXYMELATONIN | 5.64                      | 8.5                       |
| UCM549                        | 4.68                      | 7.9                       | UCM549           | 5.36                      | 9.05                      |
| S22153                        | 4.71                      | 7.95                      | 4P-PDOT          | 5.39                      | 9.1                       |
| CHLOROMELATONIN               | 5.20                      | 8                         | UCM793           | 5.20                      | 9.2                       |
| S26131                        | 5.24                      | 8.85                      | K185             | 5.51                      | 9.3                       |
| HYDROXYMELATONIN              | 5.27                      | 9.1                       | EFPEA            | 6.52                      | 9.4                       |
| UCM793                        | 4.98                      | 9.1                       | CHLOROMELATONIN  | 5.42                      | 9.6                       |
| MELATONIN                     | 5.06                      | 9.4                       | MELATONIN        | 5.09                      | 9.6                       |
| TASIMELTEON                   | 6.01                      | 9.5                       | GR196429         | 6.15                      | 9.75                      |
| GR196429                      | 5.79                      | 9.7                       | IODOMELATONINE   | 6.01                      | 10                        |
| TIK-301                       | 5.64                      | 10.1                      | RAMELTEON        | 5.84                      | 10                        |
| EFPEA                         | 5.86                      | 10.2                      | TASIMELTEON      | 6.30                      | 10.2                      |
| IODOMELATONINE                | 5.57                      | 10.2                      | AGOMELATINE      | 6.31                      | 10.2                      |
| AGOMELATINE                   | 5.88                      | 10.2                      | TIK-301          | 5.79                      | 10.4                      |
| METHOXY-DIDEHYDRO-AGOMELATINE | 6.15                      | 10.5                      |                  |                           |                           |
| RAMELTEON                     | 5.56                      | 10.9                      |                  |                           |                           |

<sup>a</sup> Experimental values were taken from IUPHAR-database [32].
